1 **Microbial tryptophan catabolism affects the vector competence of**  
2 ***Anopheles***

3

4 **Yuebiao Feng<sup>1,2,4</sup>, Yeqing Peng<sup>1,3,4</sup>, Han Wen<sup>1,2</sup>, Xiumei Song<sup>1,2</sup>, Yanpeng**  
5 **An<sup>1,3</sup>, Huiru Tang<sup>1,3\*</sup>, Jingwen Wang<sup>1,2\*</sup>**

6

7 <sup>1</sup>State Key Laboratory of Genetic Engineering, School of Life Sciences, Fudan  
8 University, Shanghai, P.R.China

9 <sup>2</sup>Ministry of Education Key Laboratory of Contemporary Anthropology, School  
10 of Life Sciences, Fudan University, Shanghai, P.R.China,

11 <sup>3</sup>Zhongshan Hospital and School of Life Sciences, Human Phenome Institute,  
12 Metabonomics and Systems Biology Laboratory at Shanghai International  
13 Centre for Molecular Phenomics, Fudan University, Shanghai, China.

14 <sup>4</sup>These authors contributed equally: Yuebiao Feng, Yeqing Peng.

15 \*Correspondence:

16 [Huiru\\_tang@fudan.edu.cn](mailto:Huiru_tang@fudan.edu.cn) (H.T.), [jingwenwang@fudan.edu.cn](mailto:jingwenwang@fudan.edu.cn) (J.W.)

17

18 **Abstract**

19 The influence of microbiota on mosquito physiology and vector competence is  
20 becoming increasingly clear but our understanding of interactions between  
21 microbiota and mosquitoes still remains incomplete. Here we show that gut  
22 microbiota of *Anopheles stephensi*, a competent malaria vector, participates  
23 mosquito tryptophan metabolism. Elimination of microbiota by antibiotics  
24 treatment leads to the accumulation of tryptophan (Trp) and its metabolites,  
25 kynurenine (Kyn), 3-hydroxykynurenine (3-HK) and xanthurenic acid (XA). Of  
26 these, 3-HK impairs the structure of peritrophic matrix (PM), thereby promoting  
27 *Plasmodium berghei* infection. Among the major gut microbiota in *An. stephensi*,  
28 *Pseudomonas alcaligenes* plays a role in catabolizing 3-HK as revealed by  
29 whole genome sequencing and LC-MS metabolic analysis. The genome of *P.*  
30 *alcaligenes* encodes kynureninase (KynU) that is responsible for the

31 conversion of 3-HK to 3-Hydroxyanthranilic acid (3-HAA). Mutation of this gene  
32 abrogates the ability of *P. alcaligenes* to metabolize 3-HK, which in turn  
33 abolishes its role on PM protection. Colonization of *An. stephensi* with KynU  
34 mutated *P. alcaligenes* fails to protect mosquitoes against parasite infection as  
35 effectively as those with wild type bacterium. In summary, we identify an  
36 unexpected function of gut microbiota in controlling mosquito tryptophan  
37 metabolism with the major consequences on vector competence.

38

## 39 **Introduction**

40

41 *Anopheles* mosquitoes, the primary vectors of malaria, are colonized by a  
42 population of diverse and dynamic microbiota<sup>1-3</sup>. These microbes play  
43 important roles on several key physiological mosquito functions, including  
44 development, nutrition and vector competence<sup>4</sup>. Of these, microbiota is vital in  
45 promoting blood meal digestion that provides essential nutrients for egg  
46 development<sup>5</sup>. Elimination of these microbes impairs blood cell lysis and slows  
47 down protein catabolism<sup>5</sup>. So far only a limited number of commensal bacteria  
48 involved in blood proteolysis have been characterized. *Serratia marcescens*  
49 contributes to erythrocytes lysis by producing hemolysins in *Anopheles*  
50 mosquito<sup>6</sup>. *Elizabethkingia anopheles* possesses the heme-binding protein,  
51 HemS, that oxidatively cleaves heme to biliverdin<sup>7</sup>. *Acinetobacter* isolates in  
52 *Aedes albopictus* are able to metabolize blood component,  $\alpha$ -keto-valeric acid  
53 and glycine, and improve blood digestion<sup>8</sup>. Proteins, accounting for about 95%  
54 of the blood constituents, are the primary source of amino acids for mosquitoes<sup>9</sup>.  
55 There is still little mechanistic insight into the contribution of microbiota toward  
56 mosquito amino acid metabolism.

57

58 Tryptophan (Trp) is one of the essential amino acids that mainly supplied by  
59 ingested blood meal<sup>10</sup>. In addition to be used in protein synthesis, tryptophan is

60 oxidized through kynurenine pathway, resulting in the production of kynurenine  
61 (Kyn), 3-hydroxykynurenine (3-HK) and xanthurenic acid (XA), and transformed  
62 into 5-Hydroxy-L-tryptophan (5-HT, serotonin) and derivatives through  
63 serotonin pathway<sup>11,12</sup>. The tryptophan metabolites play vital roles in various  
64 physiological processes of mosquitoes. 3-HK is the precursor for production of  
65 eye pigmentation during pupal development<sup>12</sup>. Serotonin that functions as a  
66 neurohormone in mosquitoes modulates insulin-like peptides expression<sup>13</sup>, ion  
67 transportation<sup>14</sup>, feeding behavior<sup>15</sup>, salivation<sup>16</sup> and heart rate<sup>17</sup>. In  
68 mammals, tryptophan and its metabolites are also key mediators that  
69 regulate immune responses and gut barrier function, thereby affecting hosts'  
70 susceptibility to pathogen infections<sup>18-23</sup>. However, little is known about the  
71 influence of mosquito tryptophan metabolism on pathogen transmission.

72

73 In this study, we show that microbiota in *Anopheles stephensi*, participates  
74 mosquito tryptophan metabolism. Elimination of microbiota leads to the  
75 accumulation of multiple tryptophan (Trp) catabolites belong to kynurenine  
76 pathway. Among these metabolites, 3-hydroxykynurenine (3-HK) elevation  
77 impairs the integrity of peritrophic matrix that functions as a physical barrier in  
78 the midgut, and facilitates *Plasmodium berghei* infection. The gut commensal  
79 bacterium, *P. alcaligenes*, processes the enzyme Kynureninase (KynU) that is  
80 responsible for catabolizing 3-HK. Mutation of KynU abolished the capacity of  
81 *P. alcaligenes* to degrade 3-HK and reduces its inhibitory effect on *P. berghei*.  
82 Collectively, our results demonstrate that a direct cross-talk of tryptophan  
83 metabolism between *An. stephensi* and gut microbiota controls the outcome of  
84 parasite infections.

85

## 86 **Result**

87

### 88 **Microbiota participates Trp metabolism**

89 To determine whether microbiota participates mosquito Trp metabolism, we  
90 performed a targeted metabolomics analysis by liquid chromatography–mass  
91 spectrometry (LC-MS). Tryptophan and its metabolites were analyzed in normal  
92 and antibiotics treated (Abx) *An. stephensi* prior to (0 h) and 24 h post blood  
93 meal. Totally 15 Trp metabolites were detected (Fig. 1a, Supplementary Table  
94 1). Trp and the metabolites of kynurenine pathway (KP), Kyn, 3-HK and XA,  
95 were significantly more abundant in Abx mosquitoes than those in controls prior  
96 to blood feeding (Fig. 1b). 5-HT and the bacterial derived metabolites 3-HAA  
97 were reduced, while indole-3-aldehyde (IAld) were increased significantly in  
98 Abx mosquitoes 24 h post blood meal (Extended Data Fig. 1). These results  
99 indicate that microbiota modulates tryptophan metabolism in *An. stephensi*.

100

101 Mosquitoes of which microbiota is removed are more susceptible to  
102 *Plasmodium* infection<sup>24</sup>. In light of our finding that the levels of KP associated  
103 compounds, Trp, Kyn, 3-HK, and XA, and 3-HAA were affected by microbiota,  
104 we hypothesized that these five KP metabolites might contribute to the  
105 increased susceptibility of mosquitoes to *P. berghei* infection. We next orally  
106 administrated these five metabolites to *An. stephensi* for 24 h, followed by fed  
107 on mice infected with *P. berghei* 1 day later. Oocyst number was examined 8-  
108 day post infection (Fig. 1c). The amount of tryptophan was used as described<sup>25</sup>  
109 and the amounts of Kyn, 3-HK, XA, and 3-HAA were used based on their  
110 corresponding level in normal mosquitoes as revealed by LC-MS analysis  
111 (Supplementary Table 2 and Table 3). As expected, orally supplementation of  
112 Trp and 3-HK via sugar meal both significantly increased oocysts number in *An.*  
113 *stephensi* (Fig. 1d, f). However, administration of Kyn, XA, and 3-HAA, had no  
114 influence on *P. berghei* infection (Fig. 1e, g, h). In addition, we examined the  
115 influence of cinnabaric acid (CA), the downstream product of 3-HAA, on *P.*  
116 *berghei* infection. No difference of oocyst number was observed between CA  
117 supplemented and non-supplemented groups (Fig. 1i). To further confirm that  
118 3-HK affects *P. berghei* infection, we knocked down the gene encoding

119 mosquito 3-hydroxykynurenine transaminase (HKT), which catalyzes the  
 120 conversion of 3-HK into XA, and analyzed mosquito infection rate. Knocking  
 121 down *HKT* (dsHKT) significantly increases oocyst number compared to dsGFP  
 122 controls (Fig. 1j). Altogether, these results suggest that tryptophan metabolism,  
 123 especially kynurenine pathway is under the regulation by both mosquito and  
 124 microbiota. The accumulation of 3-HK contributes to the increased susceptibility  
 125 to parasite infection.  
 126

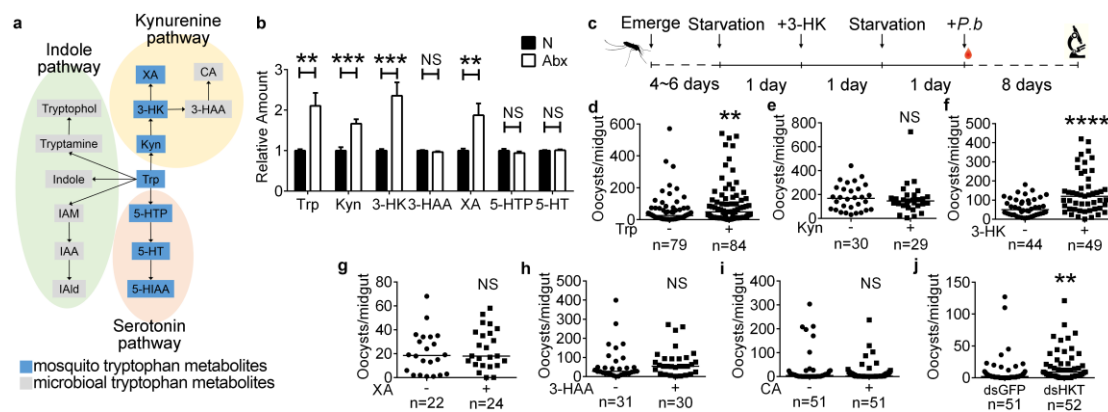

127

128 **Fig. 1 Microbiota regulated Trp metabolism modulates *P. berghei***  
 129 **infection.**

130 **a**, Standards associated with tryptophan metabolism in this study. Trp,  
 131 Tryptophan; Kyn, Kynurenine; 3-HK, 3-Hydroxy-kynurenine; XA, Xanthurenic  
 132 acid; 3-HAA, 3-Hydroxyanthranilic acid; CA, Cinnabarinic acid; 5-HTP, 5-  
 133 Hydroxy-tryptophan; 5-HT, 5-Hydroxytryptamine; 5-HIAA, 5-  
 134 Hydroxyindoleacetate, IAM, Indole-3-acetamide; IAA, Indole-3-acetic acid; IAld,  
 135 Indole-3-acetaldehyde. **b**, The relative amount of Trp, Kyn, 3-HK, XA, 3-HAA,  
 136 5-HT and 5-HTP in normal (N, n=10) and antibiotics-treated (Abx, n=9)  
 137 mosquitoes prior to blood meal. Error bars indicate standard errors. **c**, Workflow  
 138 of Trp metabolite treatments on *An. stephensi*. **d-i**, Influence of Trp metabolites,  
 139 Trp (**d**), Kyn (**e**), 3-HK (**f**), XA (**g**), 3-HAA (**h**) and CA (**i**) on *P. berghei* infection.  
 140 **j**, Influence of *HKT* knockdown on *Plasmodium* infection. Data were pooled  
 141 from two independent experiments. Horizontal black bars indicate the median

142 values. Significance was determined by Student's t-test in (b) and by Mann-  
143 Whitney tests in (d-j). \*\*P<0.01, \*\*\*P<0.001, \*\*\*\*P<0.0001.

144

### 145 **3-HK accumulation impairs PM integrity.**

146 Due to the high level of 3-HK in mosquitoes (Supplementary Table 2) and its  
147 capacity to generate oxidative stress<sup>26,27</sup>, we hypothesized that the elevation of  
148 3-HK might play a major role in disturbing the redox homeostasis in the midgut,  
149 thereby impairing the midgut epithelial barrier function and facilitating parasite  
150 infection. We first examined the ROS level in the midgut of *An. stephensi*  
151 supplemented with or without 3-HK at 0 and 24 h post blood feeding by  
152 dihydroethidium (DHE) staining. In contrast to our hypothesis, no difference of  
153 ROS level was observed between 3-HK treated and control mosquitoes either  
154 prior to or post blood meal (Extended Data Fig. 2). Midgut epithelial cells turn  
155 over rapidly due to damage from digestion and toxins<sup>28</sup>. We next examined  
156 whether ingestion of 3-HK could damage midgut epithelial cell via staining the  
157 apoptotic cells and the mitotic intestinal stem cells<sup>28</sup>. Again, 3-HK treatment  
158 didn't elicit significant changes in midgut epithelial cells, compared with controls  
159 (Extended Data Fig. 3, 4).

160

161 To further investigate the mechanism that 3-HK facilitates *P. berghei* infection,  
162 RNA sequencing was performed on midguts of mosquitoes treated with or  
163 without 3-HK at 24 h post an infectious blood meal. There were only 172 genes  
164 differentially expressed with 47 genes upregulated and 125 downregulated in  
165 3-HK treated mosquitoes (Supplementary Table 4). Among the downregulated  
166 genes with fold changes >2, we identified two genes associated with midgut  
167 epithelial barrier function, including *mucin* and *peritrophin1* (Fig. 2a).  
168 Peritrophin and mucin are important components of peritrophic matrix (PM) that  
169 protects midgut from pathogens invasion, abrasion and toxic compounds<sup>29-33</sup>.  
170 To examine whether orally administration of 3-HK could impair PM, we analyzed  
171 Peritrophin 1 (Per1) protein level and PM structure in 3-HK supplemented

172 mosquitoes. In agreement with the RNA-seq results, supplementation of 3-HK  
173 dramatically reduced Per1 protein level in the midguts (Fig 2b, c), and impaired  
174 the PM structure (Fig. 2d).

175

176 To further confirm that 3-HK-mediated increased parasite infection relies on the  
177 integrity of PM, we disrupted the formation of PM by elimination of gut  
178 microbiota as described<sup>32,33</sup>, and examined the influence of 3-HK on  
179 *Plasmodium* infection. Orally administration of 3-HK to PM compromised  
180 mosquitoes (Abx) failed to increase the number of oocysts compared with non-  
181 3-HK treated ones (Fig. 2e). Consistently, knockdown of HKT has no influence  
182 on infection outcome when PM was impaired (Fig. 2f). We next performed the  
183 same analyses on mosquitoes supplemented with Trp. Again, Trp oral  
184 administration reduced protein level of Per1 compared to controls (Extended  
185 Data Fig. 5a). Trp supplementation no longer affected *P. berghei* infection when  
186 PM was absent (Extended Data Fig. 5b). Altogether, our results suggest that  
187 elevation of 3-HK impairs PM integrity, which in turn promotes *P. berghei*  
188 infection.

189

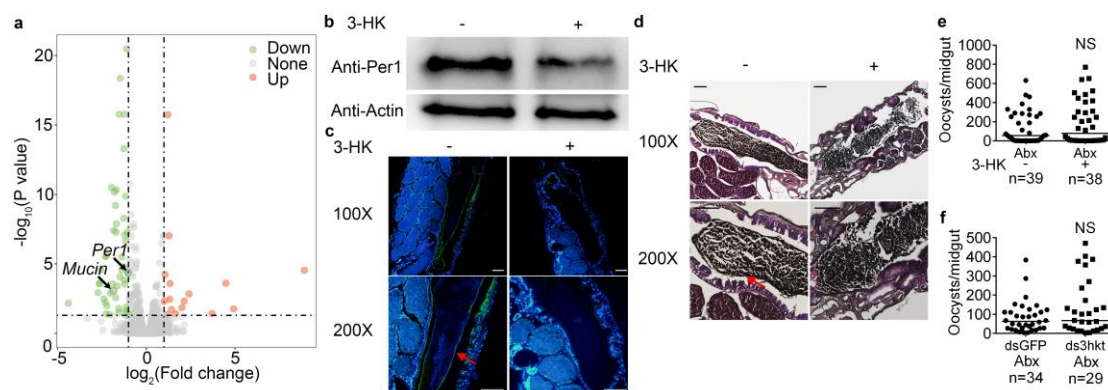

190

191 **Fig. 2 3-HK promotes *Plasmodium* infection via impairing PM.**

192 **a**, Volcano plot shows differentially expressed genes in the midguts of  
193 mosquitoes fed with/without 3-HK at 24 h post infection (hpi). Upregulated  
194 genes are shown in orange; downregulated genes are shown in green. **b**,

195 Western blot of Per1 in the midgut of 3-HK-treated (+) mosquitoes and control



196 (-) 24 h post normal blood meal. **c**, Immunostaining of Per1 (green) in the  
197 midgut of 3-HK-treated (+) and control (-) mosquitoes at 100x and 200x  
198 magnification. Nuclei were stained with DAPI (blue). Red arrows indicate  
199 Per1. Images are representative of at least five midguts. Scale bars represent  
200 100  $\mu\text{m}$ . **d**, PAS staining of PM structure in 3-HK-treated (+) and control (-)  
201 mosquitoes at 100x and 200x magnification. Red arrows indicate the PM  
202 structure. Images are representative of at least four individual mosquito  
203 midguts. Scale bars represent 100  $\mu\text{m}$ . **e**, Oocyst numbers of Abx (-) and Abx  
204 mosquitoes supplemented with 3-HK (+). **f**, Oocyst numbers of Abx  
205 mosquitoes treated with dsHKT and dsGFP. Data were pooled from two  
206 independent experiments (**e**, **f**). Each dot represents an individual mosquito.  
207 Horizontal black bars indicate the median values. Significance was  
208 determined by Mann-Whitney tests.

209

### 210 ***Pseudomonas alcaligenes* catabolizes 3-HK**

211

212 Given that gut microbiota prevents the accumulation of PM impairing 3-HK, we  
213 were interested to identify which gut commensal bacterium plays a major role  
214 in 3-HK catabolism. The population structure of gut microbiota was analyzed in  
215 the laboratory reared *An. stephensi* before blood meal. The top nine abundant  
216 genera were *Enterobacter*, *Pseudomonas*, *Gluconobacter*, *Acinetobacter*,  
217 *Vibrio*, *Tatumella*, *Photobacterium*, *Ralstonia* and *Sphingomaoans* (Fig. 3a).  
218 We next analyzed the genome sequence of the representative species in Kyoto  
219 Encyclopedia of Genes and Genomes database to evaluate their genetic  
220 capacity to catabolize 3-HK. Bacteria from Genera *Pseudomonas* and  
221 *Ralstonia* both contain kynurenine formamidase (KynB) that is responsible for  
222 the production of Kyn from N-formylkynurenine (FK), and the kynureninase  
223 (KynU) that hydrolyzes Kyn and 3-HK to anthranilate and 3-HAA, respectively  
224 (Fig. 3a)<sup>34,35</sup>. As *Pseudomonas* is the second abundant genus in *An. stephensi*,  
225 we next investigated the role of *Pseudomonas* in 3-HK metabolism. The major



226 *Pseudomonas* species in our colony *An. stephensi* is *Pseudomonas*  
227 *alcaligenes* (Extended Data Fig. 6a).

228

229 To examine the genetic capacity of the commensal *P. alcaligenes* on Trp  
230 catabolism, we obtained complete genome sequence of this bacterium by  
231 Illumina sequencing. We identified seven genes that were associated with Trp  
232 catabolism in *P. alcaligenes*. The three enzymes, kynurenine formamidase  
233 (encoded by *kynB*) and kynureninase (encoded by *kynU*) and one peroxidase  
234 (encoded by *kat*) were associated with Trp catabolism through kynurenine  
235 pathway (Fig. 3b). Tryptophan 2-monooxygenase (encoded by *TMO*), amidase,  
236 and aldehyde dehydrogenase (encoded by *ADh*) were associated with Indole  
237 pathway, and monoamine oxidase (encoded by *MAO*) was responsible for the  
238 conversion from 5-HT to 5-HIAA (Fig. 3b).

239

240 To validate the ability of *P. alcaligenes* to catabolize 3-HK in mosquitoes, we  
241 compared the Trp metabolism between Abx and Abx mosquitoes re-colonized  
242 with *P. alcaligenes* by LC-MS. *P. alcaligenes* reached  $1.2 \times 10^4$  CFU/midgut two  
243 days post inoculation (Extended Data Fig. 6b). As expected, re-colonization of  
244 *P. alcaligenes* in Abx mosquitoes significantly reduced the levels of Trp, 3-HK,  
245 and XA, compared with those in Abx mosquitoes (Fig 3c). However, we failed  
246 to detect cinnabarinic acid (CA), the end product of 3-HK, *in vivo* possibly due  
247 to their low level. Altogether, these results confirmed the commensal bacterium  
248 *P. alcaligenes* is responsible for metabolizing 3-HK in *An. stephensi*.

249

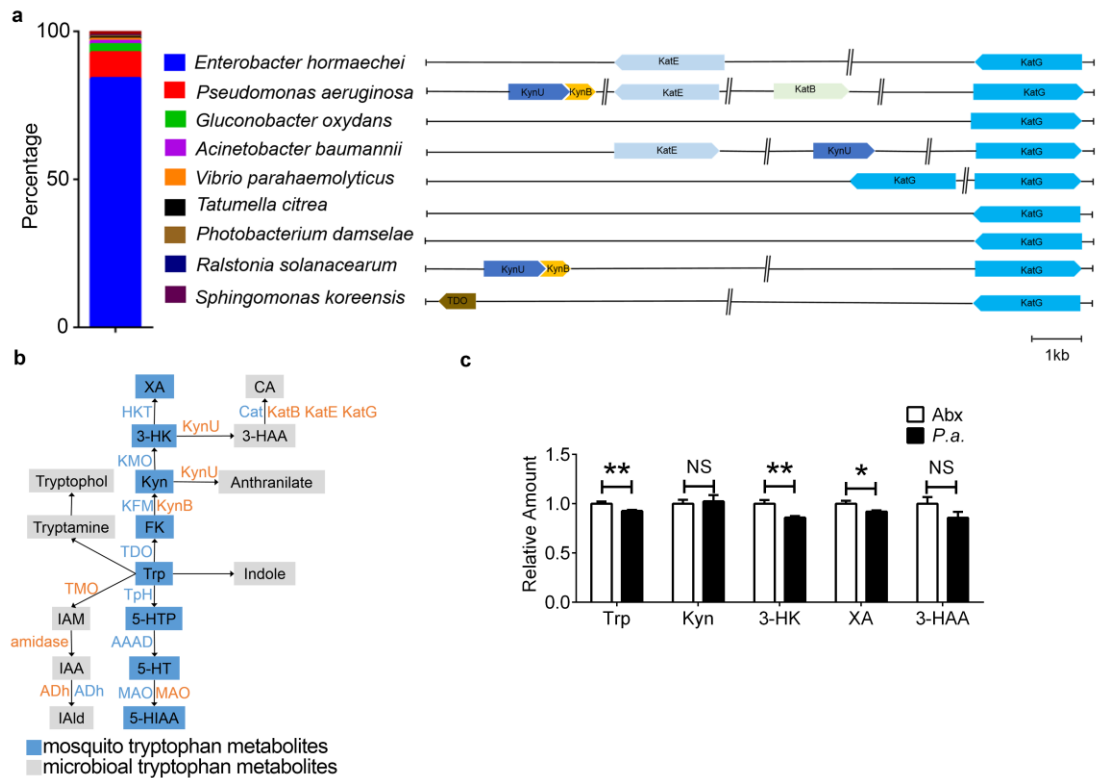

250

251 **Fig. 3 Commensal *P. alcaligenes* catabolizes mosquito 3-HK.**

252 **a**, Kynurenine pathways of major commensal bacteria in *An. stephensi*. Left  
 253 panel, relative abundance of major bacteria genera in lab-reared mosquito by  
 254 16S rRNA pyrosequencing. The column represents six pooled midguts. Right  
 255 panel, gene clusters of kynurenine metabolic pathways in the representative  
 256 bacteria species of each genus. **b**, Overview of Trp catabolism through  
 257 mosquito (blue) and *P. alcaligenes* (orange) pathways. HKT, 3-  
 258 hydroxykynurenine; KMO, Kynurenine 3-Monooxygenase; KFM, kynurenine  
 259 formamidase; TDO, Tryptophan 2,3-Dioxygenase; TpH, Tryptophan  
 260 Hydroxylase; AAAD, Aromatic Amino Acid Decarboxylase; MAO, Monoamine  
 261 Oxydase; KynU, kynureninase; Cat, Catalase; Kat, Peroxidases; TMO,  
 262 Tryptophan 2-monooxygenase; ADh, aldehyde dehydrogenase. **c**, The  
 263 relative amounts of Trp metabolites in *P. alcaligenes* recolonized (*P.a.*) and  
 264 antibiotics treated mosquito (Abx) before blood meal. Error bars indicate  
 265 standard errors (n=9). Significance was determined by Student's *t*-test. \*  
 266  $P < 0.05$ , \*\* $P < 0.01$ .

267

## 268 **Bacterial Kynureninase catabolizes 3-HK**

269

270 Kynureninase (KynU) is annotated to be responsible for the catabolism of 3-HK  
271 in *P. alcaligenes* (Fig. 3b). To verify the role of KynU on 3-HK degradation, we  
272 generated a KynU mutant, *P.a.*<sup>ΔKynU</sup>, lacking a 1005-bp coding sequence of  
273 KynU (Extended Data Fig. 7a). Mutation of KynU didn't influence bacterial  
274 growth either *in vivo* or *in vitro* (Fig. 4a, Extended Data Fig. 7b). We again  
275 assessed the influence of KynU on tryptophan metabolism in *An. stephensi*.  
276 Metabolites associated with KP were examined in Abx mosquitoes, and Abx  
277 mosquitoes colonized with wild type *P. alcaligenes*, *P.a.*<sup>WT</sup> and KynU mutant,  
278 *P.a.*<sup>ΔKynU</sup>. Mutation of KynU abolished the capability of *P. alcaligenes* to  
279 catabolize 3-HK as mosquitoes re-colonized with *P.a.*<sup>ΔKynU</sup> had significantly  
280 higher level of 3-HK than those re-colonized with *P.a.*<sup>WT</sup> (Fig. 4b). Furthermore,  
281 the levels of Kyn, XA and 3-HAA, were accumulated in *P.a.*<sup>ΔKynU</sup> colonized  
282 mosquitoes compared to *P.a.*<sup>WT</sup> colonized ones (Fig. 4b). Mutation of KynU  
283 didn't influence the overall Trp metabolic activity of mosquitoes because the Trp  
284 abundance is comparable between *P.a.*<sup>WT</sup> and *Pa*<sup>ΔKynU</sup> colonized ones (Fig. 4b).  
285 As Trp is co-metabolized by mosquito and its microbiota, blocking KynU activity  
286 in *P. alcaligenes* might increase the Trp metabolic activities of mosquito through  
287 indole and 5-HT pathways.

288

289 We next examined the influence of bacterial KynU mutation on mosquito PM  
290 formation using Per1 as an indicator by western blot. As expected, re-  
291 colonization of *P.a.*<sup>ΔKynU</sup> failed to induce Per1 protein expression as *P.a.*<sup>WT</sup> did  
292 (Fig 4c). The inhibitory effect of *P. alcaligenes* on *P. berghei* was decreased  
293 significantly when KynU was mutated (Fig. 4d). However, colonization of  
294 these mutant bacteria still increased resistance of mosquitoes to parasite  
295 infection compared to microbiota cleared ones (Abx). It might due to the  
296 stimulation of *Pa*<sup>ΔKynU</sup> in mosquito immune system. We next compared the  
297 expression level of four immune related genes, including *TEP1*, *CecA*, *GAM*

298 and *DEF*, between *P.a.<sup>WT</sup>* and *P.a.<sup>ΔKynU</sup>* re-colonized mosquitoes 24 hpi. The  
 299 expression levels of all four immune genes were comparable between *P.a.<sup>WT</sup>*  
 300 and *P.a.<sup>ΔKynU</sup>* colonized mosquitoes (Fig. 4e). Altogether, these results  
 301 suggest that in addition to stimulating mosquito immune responses, *P.*  
 302 *alcaligenes* inhibits *Plasmodium* infection through participating Trp catabolism  
 303 to prevent the accumulation of PM damaging 3-HK  
 304

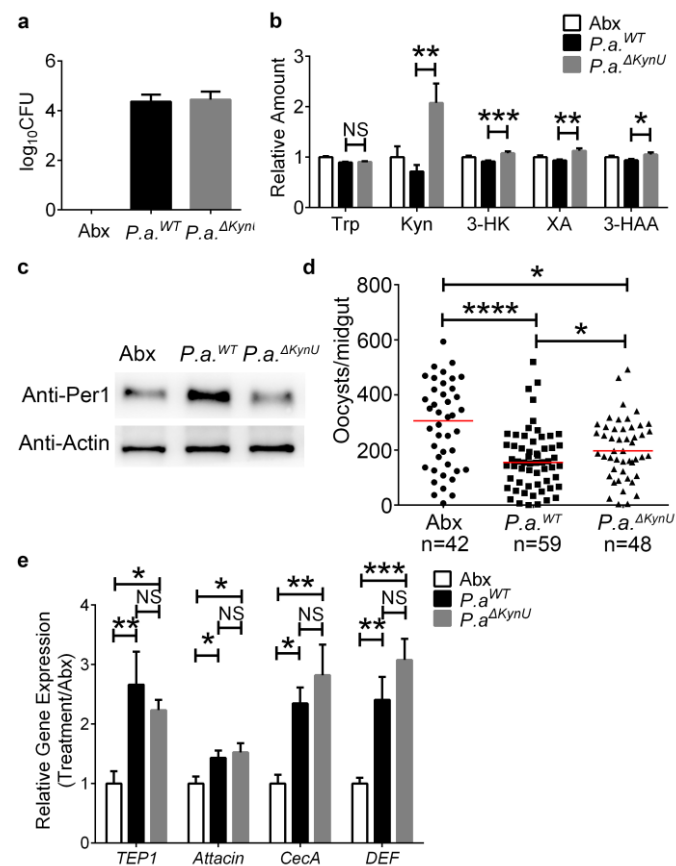

305

306 **Fig. 4 *P.alcaligenes* KynU degrades 3-HK in mosquitoes.**

307 **a**, Midgut bacterial loads in Abx and Abx mosquitoes colonized with *P.a.<sup>WT</sup>*  
 308 and *P.a.<sup>ΔKynU</sup>* before blood meal (n=6). **b**, The relative amounts of Trp  
 309 metabolites in Abx (n=10), and Abx mosquitoes colonized with *P.a.<sup>WT</sup>* and  
 310 *P.a.<sup>ΔKynU</sup>* (n=12) before blood meal. Error bars indicate standard errors. **c**,  
 311 Western blot of Per1 in the midgut of Abx, *P.a.<sup>WT</sup>* and *P.a.<sup>ΔKynU</sup>* recolonized  
 312 mosquitoes 24 h post normal blood meal. Images are representative of three  
 313 independent experiments. **d**, Oocyst numbers of Abx, *P.a.<sup>WT</sup>* and *P.a.<sup>ΔKynU</sup>*  
 314 recolonized mosquitoes. Data were pooled from two independent

315 experiments. Horizontal black bars indicate the median values. e, Relative  
316 expression levels of immune related genes in Abx, *P.a.*<sup>WT</sup> and *P.a.*<sup>ΔKynU</sup>  
317 recolonized mosquitoes. The expression level of target gene was normalized  
318 to *S7*. The relative expression level of immune genes in *P.a.*<sup>WT</sup> and *P.a.*<sup>ΔKynU</sup>  
319 colonized mosquitoes was normalized to the gene's expression in Abx,  
320 respectively. Error bars indicate standard errors (n = 6~8). Results from one  
321 of two independent experiments are shown. Significance was determined by  
322 ANOVA tests in (b, d, e). \* P<0.05, \*\*P<0.01, \*\*\*P<0.001, \*\*\*\*P<0.0001.

323

## 324 Discussion

325

326 Mosquito microbiota is known to inhibit malaria parasite infection through  
327 strengthening the immune system, stimulating the synthesis of peritrophic  
328 matrix (PM), and secreting anti-plasmodial metabolites<sup>1,3,36,37</sup>. We have  
329 established a previously unknown role for gut microbiota in promoting  
330 antiparasitic responses through participating mosquito tryptophan metabolism.  
331 Elimination of microbiota by antibiotics treatment leads to the accumulation  
332 multiple metabolites of tryptophan. Among these metabolites, 3-HK plays a role  
333 in impairing PM structure, thereby increasing susceptibility of mosquitoes to *P.*  
334 *berghei*. A midgut commensal bacterium, *P. alcaligenes*, is responsible for  
335 protecting mosquitoes against *P.berghei* infection by catabolizing 3-HK.  
336 Mutation of KynU, the 3-HK catabolizing enzyme abolishes the capability of *P.*  
337 *alcaligenes* to degrade 3-HK, which in turn facilitates parasite infection.

338

339 The study of metabolic interactions between insects and microbiota have been  
340 focused on the role of their obligate symbionts in provision of dietary limited  
341 nutrients. For example, obligate haematophagous arthropods rely on their  
342 endosymbionts to provide B vitamins and cofactors that are scarce in animal  
343 blood<sup>38</sup>. The herbivorous insects obtain essential amino acids that are deficient  
344 in the plant sap from their endosymbionts<sup>39,40</sup>. Mosquito doesn't have obligate

345 endosymbionts and relies on commensal bacteria for food digestion, nutrition  
346 assimilation, development and reproduction<sup>1,36</sup>. The oversized blood meal  
347 female mosquitoes ingested leads to the rapid proliferation of commensal  
348 bacteria, which in turn help mosquitoes to digest blood<sup>41</sup>. Tryptophan is one of  
349 the essential amino acids that mosquito obtains mainly through blood meals<sup>10</sup>.  
350 Majority of tryptophan is metabolized through kynurenine pathway in *Anopheles*  
351 mosquitoes as revealed by our LC-MS analysis. We also show that microbiota  
352 participates mosquito Trp metabolism, especially Trp to kynurenine pathway.  
353 Accumulation of 3-HK by depleting microbiota or knockdown of HKT, the 3-HK  
354 catabolizing enzyme, both increase *P. berghei* infection, suggesting that 3-HK  
355 is a key factor that influences the capacity of *An. stephensi* to transmit *P.*  
356 *berghei*. Thus, tryptophan metabolism in mosquitoes is involved in two partners,  
357 mosquito and its microbiota. The homeostasis of tryptophan metabolism  
358 controlled by these two partners play an important role in determining the vector  
359 competence of *An. stephensi*.

360

361 3-HK is toxic by producing reactive radical species under physiological  
362 conditions in mosquitoes<sup>11,42</sup>. It is also the substrate of XA that induces the  
363 formation of *Plasmodium* microgametocytes<sup>43</sup>. Our results reveal that 3-HK  
364 reduces Per1 expression and compromises PM structure. PM, equivalent to  
365 mammal intestinal mucus, is a physical barrier in *Anopheles* mosquitoes that  
366 prevents the transmission of *Plasmodium* from gut lumen to epithelium<sup>44,45</sup>. The  
367 homeostasis of gut microbiota is essential in PM structure integrity in *Anopheles*,  
368 but the underlined mechanism remains unclear<sup>32,33</sup>. Here we provide evidence  
369 that the protection of PM by microbiota might through the degradation of PM  
370 impairing toxins. Our finding is generally consistent with the mammalian models  
371 demonstrating that gut microbiota influences intestinal homeostasis by  
372 participating kynurenine pathway<sup>19,42</sup>. A variety of kynurenine metabolites,  
373 including Kyn, XA and CA, are the ligands at the aryl hydrocarbon receptor  
374 (AHR), a transcription factor that regulates the maturation of different immune

375 cells, epithelial renewal, and barrier integrity, thereby contributing to mucosal  
376 homeostasis<sup>21,42,46-48</sup>. However, the mechanism of the regulation of Per1  
377 expression by 3-HK remains unclear. It is possible that 3-HK might influence  
378 the expression of *Per1* gene or the stability of Per1 protein. In addition to  
379 influencing the expression of major PM protein, 3-HK might impair PM structure  
380 through other unknown mechanisms. XA is a *Plasmodium* exflagellation elicitor  
381 and increases *Plasmodium* infectivity in mosquitoes<sup>43,49,50</sup>. However, in our  
382 analysis, supplementation of XA at a physiological concentration to mosquitoes  
383 fails to promote parasite infection. One possible explanation is that XA fed to  
384 mosquitoes might lost its effect when *An. stephensi* is infected with *P. berghei*  
385 24 h later.

386

387 The genus *Pseudomonas* is commonly present in multiple mosquito species<sup>4,51</sup>.  
388 Several *Pseudomonas* species, including *Pseudomonas aeruginosa*,  
389 *Pseudomonas stutzeri* and *Pseudomonas rhodesiae* reduce pathogen  
390 infections in different mosquitoes, but the underlined mechanisms remain not  
391 fully understood<sup>51</sup>. Here we demonstrate that *P. alcaligenes* isolated from  
392 laboratory reared *An. stephensi* help mosquitoes to defend against  
393 *Plasmodium* by promoting 3-HK catabolism. Kynureninase, KynU, is  
394 responsible for 3-HK degradation<sup>52</sup>. Mutation of this enzyme renders *P.*  
395 *alcaligenes* unable to catabolize 3-HK, thereby losing the capability to protect  
396 PM structure. *An. stephensi* re-colonized with *KynU* mutant bacterium exhibits  
397 reduced inhibitory effect on *P. berghei* infection. However, we failed to detect  
398 the downstream product, CA, in vivo possibly due to its low abundance. Nor did  
399 we observe any difference of CA levels between microbiota cleared and normal  
400 *Anopheles* mosquitoes post blood meal. It is possible that the production of CA  
401 is mediated by both mosquitoes and microbiota genes<sup>53</sup>. Elimination of  
402 microbiota might facilitate the synthesis of CA by mosquito pathway. Exogenous  
403 supplement of either 3-HAA or CA has no influence on *Plasmodium* infection in  
404 *An. stephensi*, further suggesting that *P. alcaligenes* might play a role in



405 converting PM toxic 3-HK to other inert compounds. Although KynU mutation  
406 reduces the inhibitory effect of *P. alcaligenes* on *P. berghei* infection compared  
407 to wild type one does, its colonization still increases mosquito resistance to  
408 parasites compared to antibiotics treated ones. These results suggest that *P.*  
409 *alcaligenes* plays a dual role in inhibiting *P. berghei* infection, protecting PM by  
410 degrading toxic 3-HK and boosting mosquito immune responses. In summary,  
411 our analysis demonstrates how mosquito tryptophan metabolism modulated by  
412 gut microbiota influences midgut barrier function, thereby influencing vector  
413 competence. Modulating specific tryptophan metabolic pathways in bacteria  
414 and mosquitoes might present novel strategies for mosquito control.

415

## 416 **Methods**

417

### 418 **Mosquito maintenance and treatments**

419 The *Anopheles stephensi* (Hor strain) was reared under standard laboratory  
420 conditions<sup>33</sup>. To eliminate microbiota of *An. stephensi*, newly eclosed  
421 mosquitoes were provided with sterile 10% sucrose solution containing  
422 penicillin (10 unit/ml), streptomycin (10 µg/ml) and gentamicin (15 µg/ml) for at  
423 least four days. To introduce bacteria into the midgut, overnight culture of *P.*  
424 *alcaligenes* were resuspended in 1.5% sterile sucrose solution at a final  
425 concentration of  $1 \times 10^7$  /ml. A cotton ball soaked with the bacterium was  
426 provided to *An. stephensi* for 24 h<sup>54</sup>. *An. stephensi* that starved for 24 h was  
427 allowed to feed on *P. berghei* (ANKA) infected BALB/c with parasitemia of 3–  
428 5%<sup>33</sup>. After infection, mosquitoes were maintained at 21°C. Un-engorged  
429 mosquitoes were removed 24 h post blood meal. Midguts were dissected and  
430 oocysts were counted microscopically eight days post infection.

431

### 432 **Bacterial strains, genome sequencing and mutation**

433 *Pseudomonas alcaligenes* were isolated and characterized based on the 16S  
434 rRNA sequence from laboratory reared colony. The 16S rRNA sequences of  
435 *Pseudomonas alcaligenes* and reference strains were aligned using the

436 ClustalW multiple alignment tool. The resulting alignments were employed for  
437 Neighbor-Joining phylogenetic reconstructions using MEGA6 software<sup>55</sup>.  
438 Genome sequencing of *P. alcaligenes* was performed using Illumina NovaSeq  
439 PE150 by the Beijing Novogene Bioinformatics Technology Co., Ltd. After  
440 quality control, all good quality paired reads were assembled using the SOAP  
441 de novo, SPAdes and ABySS into a number of scaffolds<sup>56-58</sup>. Coding genes  
442 were retrieved by the GeneMarkS program<sup>59</sup>. To predict gene functions, a whole  
443 genome blast search (E-value less than  $10^{-5}$ , minimal alignment length  
444 percentage larger than 40%) was performed against KEGG database. The  
445 genomic sequence data are available at the National Center for Biotechnology  
446 Information's Sequence Read Archive (accession no. PRJNA686701). The  
447 fragment of *P.alcaligenes* kynureninase corresponding to bases 61-1065 was  
448 deleted by KnoGen Biotech Ltd, Guangzhou, China. The *P.a.* <sup>$\Delta$ KynU</sup> mutant strain  
449 was validated by PCR with the KyuN-TF/KyuN-TR primers. The primers were  
450 shown in Supplementary Table 5.

451

## 452 **Metabolites Extraction**

453 Extraction of metabolites from mosquitoes was performed according to the  
454 previous reference with minor adjustment<sup>60</sup>. Briefly, fifteen mosquitoes (about  
455 30 mg) were pooled for one biological sample. Eight to ten biological replicates  
456 were used in the following LC-MS analysis. Briefly, mosquitoes were snap-  
457 frozen in liquid nitrogen and homogenized in 400  $\mu$ l of precooled 80% methanol-  
458 ddH<sub>2</sub>O solution (containing 10  $\mu$ l of internal standard). After 10 min  
459 centrifugation (14,000 g, 4 °C), supernatant was saved and pellet was re-  
460 extracted in 400  $\mu$ l of precooled methanol-ddH<sub>2</sub>O two more times. All  
461 supernatants were combined and centrifuged at 14,000 g, 4 °C for 10 min, then  
462 1 ml supernatant was transferred into a new tube. Methanol was removed under  
463 vacuum using Eppendorf Concentrator plus, and the remaining liquid was  
464 lyophilized in a freeze-drier.

465

## 466 **LC-MS analysis**

467 Dried metabolite extracts were re-dissolved in 200  $\mu$ l of 80% methanol-ddH<sub>2</sub>O  
468 solution for LC-MS/MS analysis. LC-MS/MS analysis was performed on a  
469 Nexera UHPLC system (Shimadzu, MD) coupled to an ABSciex QTrap 5500 or  
470 6500 mass spectrometer (Framingham, USA). An Agilent ZORBAX RRHD  
471 Eclipse Plus C18 (2.1 mm $\times$ 50 mm, 1.8  $\mu$ m) column at 35 °C was utilized for  
472 LC separation. Samples were injected (1  $\mu$ l or 10  $\mu$ l) from the autosampler kept  
473 at 4 °C. Then mobile phase A (H<sub>2</sub>O containing 0.1% formic acid) and mobile  
474 phase B (acetonitrile containing 0.1% formic acid) were prepared for sample  
475 elution. The gradient elution was detailed as follows: 2 % mobile phase B was  
476 maintained for 3 min with flow rate setting at 0.3 ml / min and then mobile phase  
477 B was increased from 2 % to 80 % within 3 min with flow rate setting at 0.5 ml  
478 / min and kept for 2 min, finally the column was reconditioned for 2 min at 2%  
479 mobile phase B, the flow rate was set at 0.3 ml / min. For 5500 mass  
480 spectrometer detection, mass spectra were acquired on a positive and negative  
481 ESI mode with the curtain gas flow of 35 psi, the collision gas of medium, the  
482 Ion Spray voltage of 5.5 kV or -4.5 kV, the source temperature was 550 °C, the  
483 ion source gas 1 (GS1) was 55 psi, the ion source gas 2 (GS2) was 55 psi. Both  
484 of the entrance potential (EP) and collision cell exit potential (CXP) was set as  
485 10 V or -10 V. For 6500 mass spectrometer detection, mass spectra were  
486 acquired on a positive and negative ESI mode with the curtain gas flow of 40  
487 psi, the collision gas of medium, the Ion Spray voltage of 5.5 kV or -4.5 kV, the  
488 source temperature was 400 °C, the GS1 was 55 psi, the GS2 was 60 psi. Both  
489 of the EP and CXP was set as 10 V or -10 V. The MRM transition ions of the  
490 metabolites and its IS are detailed in Supplementary Table 6. Peak identification  
491 and metabolites amount were evaluated based on the known amount of  
492 tryptophan metabolites.

493

## 494 **Dietary supplementation of Trp metabolites**

495 Information of tryptophan and tryptophan metabolites used in this study were  
496 listed in Supplementary Table 3. Four to six-day-old mosquitoes were orally  
497 supplemented with 10% sucrose solution containing metabolites with indicated  
498 concentration for one day (Supplementary Table 3). Then mosquitoes were  
499 starved for 24 h prior to blood feeding.

500

### 501 **RNA extraction and quantitative PCR analysis**

502 RNA was extracted from one mosquito or three pooled midguts using TRIzol  
503 reagent (Sigma-Aldrich, China) according to the standard protocol. Reverse  
504 transcription and quantitative PCR were performed as previously described<sup>61</sup>.  
505 The *An. stephensi* ribosomal gene *s7* was used as internal control. Primers  
506 were listed in Supplementary Table 5.

507

### 508 **Western Blot analysis**

509 Proteins of 10 midguts 24 h post blood meal were extracted in 300  $\mu$ l SDS/urea  
510 lysis buffer (8 M urea, 2 % SDS, 5 %  $\beta$ -mercaptoethanol, 125 mM Tris-HCl).  
511 Immunoblotting was performed using standard procedures using the antibodies  
512 rabbit anti-Per1 antibody (1:5000) and mouse anti- $\beta$ -Actin antibody (1:2000)  
513 (Abbkine, China). The rabbit polyclonal anti-Per1 antibody was generated  
514 against recombinant Per1 protein (recPer1) corresponding to bases 55-462 of  
515 *per1* CDS (Aste010406) expressed in pET-42a (Novagen) commercially (GL  
516 Biochem Ltd, Shanghai, China).

517

### 518 **Transcriptome analysis**

519 RNA was extracted from 20 pooled midguts dissected from mosquitoes 24 h  
520 post infectious blood meal. Three biological replicates of each treatment were  
521 used for RNA sequencing. Samples were sent to Majorbio, China for library  
522 construction and sequencing using Illumina HiSeq xten. Clean reads were  
523 aligned to the reference genome AsteS1.7  
524 (<https://www.vectorbase.org/organisms/anopheles-stephensi>) using TopHat

525 software<sup>62</sup>. Gene expression was compared using the DESeq2 package in R<sup>63</sup>.  
526 Genes with adjusted P-value less than 0.05 were considered as significantly  
527 differentially expressed genes. Raw data are available at the National Center  
528 for Biotechnology Information's Sequence Read Archive (accession no.  
529 PRJNA686698).

530

### 531 **Microbiota analysis by 16S rRNA Sequencing**

532 Total DNA was isolated from individual 5- day- old mosquito using Holmes-  
533 Bonner method<sup>64</sup>. Six biological replicates were used for the analyzation of  
534 population structure of microbiota by 16S rRNA pyrosequencing targeting V3-  
535 V4 region (341F, 806R) by Majorbio Bio-Pharm Technology Co. Ltd. (Shanghai,  
536 China) using MiSeq platform<sup>65</sup>. A total of 413179 sequences with an average  
537 length of 449 bp were obtained. Following quality filtering and chimera  
538 sequences removal, sequences analysis were performed by Uparse software<sup>66</sup>.  
539 Sequences with  $\geq 97\%$  similarity were assigned to the same OTUs and  
540 representative sequences were annotated by the Silva Database to identify  
541 taxonomic information. Relative abundances were represented by OTU  
542 abundances, the number of reads for the given OTU divided by that of total  
543 OTUs. The 16S rRNA gene sequences are available at the National Center for  
544 Biotechnology Information's Sequence Read Archive (accession no.  
545 PRJNA686689).

546

### 547 **PM structure analysis**

548 Fluorescent immunostaining of Per1 was performed as described<sup>67</sup>. Briefly, the  
549 abdomens of *An. stephensi* 45 h post blood meal were collected and fixed in 4%  
550 paraformaldehyde at 4 °C overnight. Paraffin embedded sample was sectioned  
551 at 5  $\mu\text{m}$  thickness and stained with anti-Per1 (1:100) and Alexa Fluor 546  
552 (1:5000) (Invitrogen). Images were captured using a Nikon ECLIPSE IVi  
553 microscope connected to a Nikon DIGITAL SIGHT DS-U3 digital camera. PM  
554 structure was stained by Periodic Acid Schiff (PAS) (Sigma-Aldrich, China) as

555 describe previously<sup>61</sup>. PM structure was observed under Nikon ECLIPSE IVi  
556 microscope connected to a Nikon DIGITAL SIGHT DS-U3 digital camera.

557

### 558 **TUNEL staining**

559 Fresh prepared slides of the abdomens prior to and 45 h post blood meal were  
560 used for TUNEL staining according to the manufacturers' instructions (Yeasen,  
561 Shanghai). Briefly, paraffin sections were dewaxed by xylenes and rehydrated  
562 with a graded series of ethanol. Tissue was permeabilized with 20 µg/ml  
563 proteinase K for 20 min at room temperature. After PBS rinse, slides were  
564 equilibrated with 1× Equilibration Buffer for 30 min at room temperature, then  
565 equilibration Buffer was removed and slides were incubated with TUNEL  
566 reaction mixture that contains Alexa Fluor 488-12-dUTP at 37 °C for 1 hr.  
567 Apoptosis positive signal was acquired with 488 nm excitation using a Nikon  
568 ECLIPSE IVi microscope. Nuclei were stained with DAPI.

569

### 570 **DHE staining**

571 The mosquito midguts were dissected in PBS at 0 h and 24 h post normal blood  
572 meal. DHE staining was performed as previously described<sup>68</sup>. Briefly, midguts  
573 were incubated with 5 µM dihydroethidium (DHE) (Beyotime, China) at room  
574 temperature for 20 min in the dark. Image was captured using Zeiss-LSM880  
575 confocal microscope.

576

### 577 **PH3 staining**

578 PH3 staining was performed as previous described<sup>69</sup>. Briefly, midguts were  
579 dissected in PBS at 0 h and 24 h post normal blood meal. Dissected guts were  
580 fixed with 4% paraformaldehyde for 20 min at room temperature, then rinsed in  
581 PBT with 0.1% Triton X-100. After blocking with 3% BSA for 2 h, midguts were  
582 incubated with 1:1000 anti-PH3 (Merck, Germany) overnight at 4°C. Alexa  
583 Fluor 546 (1:5000) (Invitrogen) was used as secondary antibody. Images were  
584 acquired by Zeiss-LSM880 confocal microscope.

585

## 586 **Statistics**

587 All statistical analyses were performed using GraphPad Prism software. The  
588 details of statistical methods are provided in the figure legends. Difference of  
589 oocyst number between two groups was analyzed using the Mann-Whitney  
590 test, among more than two groups was analyzed using ANOVA. Difference of  
591 metabolites between two groups was analyzed using the Student's t-test ,  
592 among more than two groups was analyzed using ANOVA. The statistical  
593 analysis of metabolomics data and transcriptome data are described in the  
594 corresponding methods.

595

## 596 **Acknowledgements**

597 We thank Guoliang Zhang, Chuyang Wang and Professor Jinying Gou at  
598 School of Life Sciences, Fudan University for their technical advice on  
599 metabolites analysis. This work was supported by the National Natural Science  
600 Foundation of China (U1902211, 31822051) and the National Institutes of  
601 Health Grant (R01AI129819) to J. W.

602

## 603 **Author contributions**

604 Y.F., Y. P., J.W. and H.T. designed experiments, interpreted results and wrote  
605 the paper. Y. P. and Y. A. performed metabolites analysis. H. W. and X. S.  
606 conducted PM structure analysis experiments. H. W. and Y. F. conducted  
607 bacteria recolonization and *Plasmodium* infection experiments. Y.F.  
608 conducted and analyzed results from all additional experiments. J. W. and  
609 H.T. supervised the study. All authors discussed the results and commented  
610 on the manuscript.

611

## 612 **Competing interests**

613 The authors declare no competing interests.



614 **REFERENCES (50 maximum)**

- 615 1 Gao, H., Cui, C., Wang, L., Jacobs-Lorena, M. & Wang, S. Mosquito  
616 Microbiota and Implications for Disease Control. *Trends Parasitol* **36**, 98-  
617 111, doi:10.1016/j.pt.2019.12.001 (2020).
- 618 2 Guegan, M. *et al.* The mosquito holobiont: fresh insight into mosquito-  
619 microbiota interactions. *Microbiome* **6**, 49, doi:10.1186/s40168-018-0435-2  
620 (2018).
- 621 3 Romoli, O. & Gendrin, M. The tripartite interactions between the mosquito,  
622 its microbiota and Plasmodium. *Parasit Vectors* **11**, 200, doi:10.1186/s13071-  
623 018-2784-x (2018).
- 624 4 Minard, G., Mavingui, P. & Moro, C. V. Diversity and function of bacterial  
625 microbiota in the mosquito holobiont. *Parasites Vectors* **6**, 1-12,  
626 doi:10.1186/1756-3305-6-146 (2013).
- 627 5 Gaio Ade, O. *et al.* Contribution of midgut bacteria to blood digestion and  
628 egg production in aedes aegypti (diptera: culicidae) (L.). *Parasit Vectors*  
629 **4**, 105, doi:10.1186/1756-3305-4-105 (2011).
- 630 6 Chen, S., Blom, J. & Walker, E. D. Genomic, Physiologic, and Symbiotic  
631 Characterization of Serratia marcescens Strains Isolated from the Mosquito  
632 Anopheles stephensi. *Frontiers in microbiology* **8**, 1483,  
633 doi:10.3389/fmicb.2017.01483 (2017).
- 634 7 Ganley, J. G., D'Ambrosio, H. K., Shieh, M. & Derbyshire, E. R. Coculturing  
635 of Mosquito - Microbiome Bacteria Promotes Heme Degradation in  
636 Elizabethkingia anophelis. *Chembiochem : a European journal of chemical*  
637 *biology* (2020).
- 638 8 Minard, G. *et al.* Prevalence, genomic and metabolic profiles of  
639 Acinetobacter and Asaia associated with field-caught Aedes albopictus from  
640 Madagascar. *FEMS Microbiol Ecol* **83**, 63-73, doi:10.1111/j.1574-  
641 6941.2012.01455.x (2013).
- 642 9 Lehane, M. J. & Lehane, M. *The biology of blood-sucking in insects.*  
643 (Cambridge University Press, 2005).
- 644 10 Boudko, D. Y. Molecular basis of essential amino acid transport from  
645 studies of insect nutrient amino acid transporters of the SLC6 family (NAT-  
646 SLC6). *Journal of Insect Physiology* **58**, 433-449,  
647 doi:<http://dx.doi.org/10.1016/j.jinsphys.2011.12.018> (2012).
- 648 11 Han, Q., Beerntsen, B. T. & Li, J. The tryptophan oxidation pathway in  
649 mosquitoes with emphasis on xanthurenic acid biosynthesis. *Journal of*  
650 *Insect Physiology* **53**, 254-263,  
651 doi:<http://dx.doi.org/10.1016/j.jinsphys.2006.09.004> (2007).
- 652 12 Li, J., Beerntsen, B. T. & James, A. A. Oxidation of 3-hydroxykynurenine to  
653 produce xanthommatin for eye pigmentation: a major branch pathway of  
654 tryptophan catabolism during pupal development in the yellow fever  
655 mosquito, Aedes aegypti. *Insect biochemistry and molecular biology* **29**, 329-  
656 338 (1999).
- 657 13 Ling, L. & Raikhel, A. S. Serotonin signaling regulates insulin-like

- 658 peptides for growth, reproduction, and metabolism in the disease vector  
659 *Aedes aegypti*. *Proceedings of the National Academy of Sciences of the*  
660 *United States of America* **115**, E9822–E9831, doi:10.1073/pnas.1808243115  
661 (2018).
- 662 14 Clark, T. M., Koch, A. & Moffett, D. F. The anterior and posterior  
663 ‘stomach’ regions of larval *Aedes aegypti* midgut: regional specialization  
664 of ion transport and stimulation by 5-hydroxytryptamine. *Journal of*  
665 *Experimental Biology* **202**, 247–252 (1999).
- 666 15 Kinney, M. P., Panting, N. D. & Clark, T. M. Modulation of appetite and  
667 feeding behavior of the larval mosquito *Aedes aegypti* by the serotonin-  
668 selective reuptake inhibitor paroxetine: shifts between distinct feeding  
669 modes and the influence of feeding status. *Journal of Experimental Biology*  
670 **217**, 935–943 (2014).
- 671 16 Novak, M. G., Ribeiro, J. & Hildebrand, J. G. 5-hydroxytryptamine in the  
672 salivary glands of adult female *Aedes aegypti* and its role in regulation of  
673 salivation. *Journal of Experimental Biology* **198**, 167–174 (1995).
- 674 17 Hillyer, J. F., Estevez-Lao, T. Y. & Mirzai, H. E. The neurotransmitters  
675 serotonin and glutamate accelerate the heart rate of the mosquito *Anopheles*  
676 *gambiae*. *Comparative biochemistry and physiology. Part A, Molecular &*  
677 *integrative physiology* **188**, 49–57, doi:10.1016/j.cbpa.2015.06.015 (2015).
- 678 18 Roager, H. M. & Licht, T. R. Microbial tryptophan catabolites in health and  
679 disease. *Nature Communications* **9**, 3294, doi:10.1038/s41467-018-05470-4  
680 (2018).
- 681 19 Agus, A., Planchais, J. & Sokol, H. Gut Microbiota Regulation of Tryptophan  
682 Metabolism in Health and Disease. *Cell host & microbe* **23**, 716–724,  
683 doi:10.1016/j.chom.2018.05.003 (2018).
- 684 20 Andrade, M. E. *et al.* The role of immunomodulators on intestinal barrier  
685 homeostasis in experimental models. *Clinical nutrition (Edinburgh,*  
686 *Scotland)* **34**, 1080–1087, doi:10.1016/j.clnu.2015.01.012 (2015).
- 687 21 Kayama, H. & Takeda, K. Manipulation of epithelial integrity and mucosal  
688 immunity by host and microbiota-derived metabolites. **50**, 921–931,  
689 doi:10.1002/eji.201948478 (2020).
- 690 22 Taleb, S. Tryptophan Dietary Impacts Gut Barrier and Metabolic Diseases.  
691 *Front Immunol* **10**, 2113, doi:10.3389/fimmu.2019.02113 (2019).
- 692 23 Mehraj, V. & Routy, J. P. Tryptophan Catabolism in Chronic Viral  
693 Infections: Handling Uninvited Guests. *Int J Tryptophan Res* **8**, 41–48,  
694 doi:10.4137/ijtr.s26862 (2015).
- 695 24 Dong, Y., Manfredini, F. & Dimopoulos, G. Implication of the mosquito  
696 midgut microbiota in the defense against malaria parasites. *PLoS pathogens*  
697 **5**, e1000423–e1000423, doi:10.1371/journal.ppat.1000423 (2009).
- 698 25 Okech, B., Arai, M. & Matsuoka, H. The effects of blood feeding and  
699 exogenous supply of tryptophan on the quantities of xanthurenic acid in the  
700 salivary glands of *Anopheles stephensi* (Diptera: Culicidae). *Biochemical*  
701 *and Biophysical Research Communications* **341**, 1113–1118,

- 702           doi:<http://dx.doi.org/10.1016/j.bbrc.2006.01.079> (2006).
- 703 26       Stone, T. W., Stoy, N. & Darlington, L. G. An expanding range of targets  
704       for kynurenine metabolites of tryptophan. *Trends in pharmacological*  
705       *sciences* **34**, 136–143, doi:10.1016/j.tips.2012.09.006 (2013).
- 706 27       Platten, M., Nollen, E. A., Röhrig, U. F., Fallarino, F. & Opitz, C. A.  
707       Tryptophan metabolism as a common therapeutic target in cancer,  
708       neurodegeneration and beyond. *Nature reviews Drug discovery* **18**, 379–401  
709       (2019).
- 710 28       Jiang, H. *et al.* Cytokine/Jak/Stat signaling mediates regeneration and  
711       homeostasis in the Drosophila midgut. *Cell* **137**, 1343–1355 (2009).
- 712 29       Whiten, S. R., Ray, W. K., Helm, R. F. & Adelman, Z. N. Characterization of  
713       the adult *Aedes aegypti* early midgut peritrophic matrix proteome using LC-  
714       MS. *PLoS one* **13**, e0194734 (2018).
- 715 30       Shen, Z., Dimopoulos, G., Kafatos, F. C. & Jacobs-Lorena, M. A cell surface  
716       mucin specifically expressed in the midgut of the malaria mosquito  
717       *Anopheles gambiae*. *Proceedings of the National Academy of Sciences* **96**,  
718       5610–5615 (1999).
- 719 31       Wu, P. *et al.* A Gut Commensal Bacterium Promotes Mosquito Permissiveness to  
720       Arboviruses. *Cell host & microbe* **25**, 101–112. e105,  
721       doi:10.1016/j.chom.2018.11.004 (2019).
- 722 32       Rodgers, F. H., Gendrin, M., Wyer, C. A. & Christophides, G. K. Microbiota-  
723       induced peritrophic matrix regulates midgut homeostasis and prevents  
724       systemic infection of malaria vector mosquitoes. *PLoS pathogens* **13**,  
725       e1006391 (2017).
- 726 33       Song, X., Wang, M., Dong, L. & Zhu, H. PGRP-LD mediates *A. stephensi* vector  
727       competency by regulating homeostasis of microbiota-induced peritrophic  
728       matrix synthesis. *PLoS pathogens* **14**, e1006899,  
729       doi:10.1371/journal.ppat.1006899 (2018).
- 730 34       Phillips, R. S. Structure and mechanism of kynureninase. *Archives of*  
731       *biochemistry and biophysics* **544**, 69–74 (2014).
- 732 35       Bortolotti, P. *et al.* Tryptophan catabolism in *Pseudomonas aeruginosa* and  
733       potential for inter-kingdom relationship. *BMC microbiology* **16**, 1–10,  
734       doi:10.1186/s12866-016-0756-x (2016).
- 735 36       Huang, W., Wang, S. & Jacobs-Lorena, M. Use of Microbiota to Fight  
736       Mosquito-Borne Disease. *Frontiers in genetics* **11**, 196,  
737       doi:10.3389/fgene.2020.00196 (2020).
- 738 37       Strand, M. R. Composition and functional roles of the gut microbiota in  
739       mosquitoes. *Curr Opin Insect Sci* **28**, 59–65, doi:10.1016/j.cois.2018.05.008  
740       (2018).
- 741 38       Rio, R. V. M., Attardo, G. M. & Weiss, B. L. Grandeur Alliances: Symbiont  
742       Metabolic Integration and Obligate Arthropod Hematophagy. *Trends Parasitol*  
743       **32**, 739–749, doi:10.1016/j.pt.2016.05.002 (2016).
- 744 39       Skidmore, I. H. & Hansen, A. K. The evolutionary development of plant -  
745       feeding insects and their nutritional endosymbionts. *Insect science* **24**,

- 746 910–928 (2017).
- 747 40 Douglas, A. E. How multi-partner endosymbioses function. *Nature Reviews*  
748 *Microbiology* **14**, 731 (2016).
- 749 41 Gaio, A. d. O. *et al.* Contribution of midgut bacteria to blood digestion  
750 and egg production in aedes aegypti (diptera: culicidae) (L.). *Parasites*  
751 *Vectors* **4**, 105–105, doi:10.1186/1756-3305-4-105 (2011).
- 752 42 Stone, T. W., Stoy, N. & Darlington, L. G. An expanding range of targets  
753 for kynurenine metabolites of tryptophan. *Trends in pharmacological*  
754 *sciences* **34**, 136–143, doi:https://doi.org/10.1016/j.tips.2012.09.006  
755 (2013).
- 756 43 Billker, O. *et al.* Identification of xanthurenic acid as the putative  
757 inducer of malaria development in the mosquito. *Nature* **392**, 289–292 (1998).
- 758 44 Billingsley, P. F. & Rudin, W. The role of the mosquito peritrophic  
759 membrane in bloodmeal digestion and infectivity of Plasmodium species. *J*  
760 *Parasitol* **78**, 430–440 (1992).
- 761 45 Tsai, Y.-L., Hayward, R. E., Langer, R. C., Fidock, D. A. & Vinetz, J. M.  
762 Disruption of Plasmodium falciparum Chitinase Markedly Impairs Parasite  
763 Invasion of Mosquito Midgut. *Infection and immunity* **69**, 4048–4054 (2001).
- 764 46 Platten, M., Nollen, E. A. A., Röhrig, U. F., Fallarino, F. & Opitz, C. A.  
765 Tryptophan metabolism as a common therapeutic target in cancer,  
766 neurodegeneration and beyond. *Nature Reviews Drug Discovery* **18**, 379–401,  
767 doi:10.1038/s41573-019-0016-5 (2019).
- 768 47 Lamas, B., Natividad, J. M. & Sokol, H. Aryl hydrocarbon receptor and  
769 intestinal immunity. *Mucosal immunology* **11**, 1024–1038, doi:10.1038/s41385-  
770 018-0019-2 (2018).
- 771 48 Fazio, F. *et al.* Cinnabarinic acid, an endogenous metabolite of the  
772 kynurenine pathway, activates type 4 metabotropic glutamate receptors.  
773 *Molecular pharmacology* **81**, 643–656, doi:10.1124/mol.111.074765 (2012).
- 774 49 Garcia, G. E., Wirtz, R. A., Barr, J. R., Woolfitt, A. & Rosenberg, R.  
775 Xanthurenic acid induces gametogenesis in Plasmodium, the malaria parasite.  
776 *The Journal of biological chemistry* **273**, 12003–12005,  
777 doi:10.1074/jbc.273.20.12003 (1998).
- 778 50 Bhattacharyya, M. K. & Kumar, N. Effect of xanthurenic acid on infectivity  
779 of Plasmodium falciparum to Anopheles stephensi. *Int J Parasitol* **31**, 1129–  
780 1133, doi:10.1016/s0020-7519(01)00222-3 (2001).
- 781 51 Dennison, N. J., Jupatanakul, N. & Dimopoulos, G. The mosquito microbiota  
782 influences vector competence for human pathogens. *Curr Opin Insect Sci* **3**,  
783 6–13, doi:10.1016/j.cois.2014.07.004 (2014).
- 784 52 Phillips, R. S. Structure and mechanism of kynureninase. *Archives of*  
785 *biochemistry and biophysics* **544**, 69–74, doi:10.1016/j.abb.2013.10.020  
786 (2014).
- 787 53 Fazio, F. *et al.* Cinnabarinic acid and xanthurenic acid: Two kynurenine  
788 metabolites that interact with metabotropic glutamate receptors.  
789 *Neuropharmacology* **112**, 365–372 (2017).

- 790 54 Bahia, A. C. *et al.* Exploring Anopheles gut bacteria for Plasmodium  
791 blocking activity. *Environmental microbiology* **16**, 2980–2994,  
792 doi:10.1111/1462-2920.12381 (2014).
- 793 55 Tamura, K., Dudley, J., Nei, M. & Kumar, S. MEGA4: molecular evolutionary  
794 genetics analysis (MEGA) software version 4.0. *Molecular biology and*  
795 *evolution* **24**, 1596–1599 (2007).
- 796 56 Li, R., Li, Y., Kristiansen, K. & Wang, J. SOAP: short oligonucleotide  
797 alignment program. *Bioinformatics* **24**, 713–714 (2008).
- 798 57 Bankevich, A. *et al.* SPAdes: a new genome assembly algorithm and its  
799 applications to single-cell sequencing. *Journal of computational biology*  
800 **19**, 455–477 (2012).
- 801 58 Simpson, J. T. *et al.* ABySS: a parallel assembler for short read sequence  
802 data. *Genome research* **19**, 1117–1123 (2009).
- 803 59 Besemer, J., Lomsadze, A. & Borodovsky, M. GeneMarkS: a self-training  
804 method for prediction of gene starts in microbial genomes. Implications for  
805 finding sequence motifs in regulatory regions. *Nucleic acids research* **29**,  
806 2607–2618 (2001).
- 807 60 An, Y. *et al.* High-fat diet induces dynamic metabolic alterations in  
808 multiple biological matrices of rats. *J Proteome Res* **12**, 3755–3768,  
809 doi:10.1021/pr400398b (2013).
- 810 61 Song, X., Wang, M., Dong, L., Zhu, H. & Wang, J. PGRP-LD mediates *A.*  
811 *stephensi* vector competency by regulating homeostasis of microbiota-induced  
812 peritrophic matrix synthesis. *PLoS pathogens* **14**, e1006899,  
813 doi:10.1371/journal.ppat.1006899 (2018).
- 814 62 Trapnell, C., Pachter, L. & Salzberg, S. L. TopHat: discovering splice  
815 junctions with RNA-Seq. *Bioinformatics* **25**, 1105–1111,  
816 doi:10.1093/bioinformatics/btp120 (2009).
- 817 63 Love, M. I., Huber, W. & Anders, S. Moderated estimation of fold change and  
818 dispersion for RNA-seq data with DESeq2. *Genome biology* **15**, 550,  
819 doi:10.1186/s13059-014-0550-8 (2014).
- 820 64 Holmes, D. S. & Bonner, J. Preparation, molecular weight, base composition,  
821 and secondary structure of giant nuclear ribonucleic acid. *Biochemistry* **12**,  
822 2330–2338 (1973).
- 823 65 Michelsen CF, P. P., Glaring MA, Schjoerring JK, Stougaard P. Bacterial  
824 diversity in Greenlandic soils as affected by potato  
825 cropping and inorganic versus organic fertilization. *Polar Biology* **37**, 61–71,  
826 doi:10.1007/s00300-013-1410-9 (2014).
- 827 66 Edgar, R. C. UPARSE: highly accurate OTU sequences from microbial amplicon  
828 reads. *Nature methods* **10**, 996–998, doi:10.1038/nmeth.2604 (2013).
- 829 67 Yassine, H., Kamareddine, L. & Osta, M. A. The Mosquito Melanization  
830 Response Is Implicated in Defense against the Entomopathogenic Fungus  
831 *Beauveria bassiana*. *PLoS pathogens* **8**, e1003029,  
832 doi:10.1371/journal.ppat.1003029 (2012).
- 833 68 Oliveira, J. H. M. *et al.* Blood meal-derived heme decreases ROS levels in

834 the midgut of *Aedes aegypti* and allows proliferation of intestinal  
835 microbiota. *PLoS pathogens* **7**, e1001320–e1001320,  
836 doi:10.1371/annotation/34fed6f4-4096-4980-bf2f-b918e14f5ff5.. Linking ISSN:  
837 15537366. Subset: IM; Grant Information: United States Howard Hughes  
838 Medical Institute Date of Electronic Publication: 2011 Mar 17. ; Original  
839 Imprints: Publication: San Francisco, CA : Public Library of Science,  
840 c2005-  
841 10.1371/journal.ppat.1001320 (2011).  
842 69 Buchon, N., Broderick, N. A., Poidevin, M., Pradervand, S. & Lemaitre, B.  
843 *Drosophila* Intestinal Response to Bacterial Infection: Activation of Host  
844 Defense and Stem Cell Proliferation. *Cell host & microbe* **5**, 200–211,  
845 doi:<http://dx.doi.org/10.1016/j.chom.2009.01.003> (2009).  
846  
847

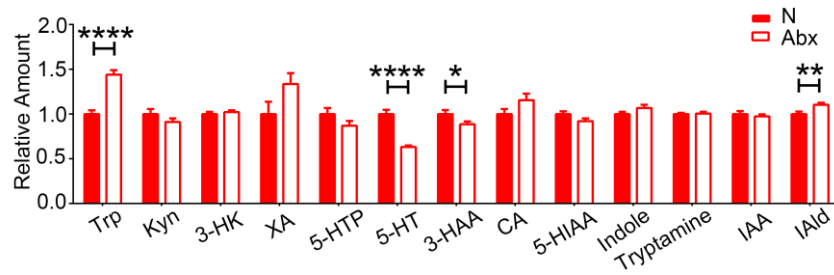

848

849 **Extended Data Fig. 1** The relative amounts of Trp metabolites in normal (N) and  
850 antibiotics-treated (Abx) mosquitoes 24 h post normal blood meal. Error bars indicate  
851 standard errors (n=10). Significance was determined by Student's *t*-test. \*  $P < 0.05$ ,  
852 \*\* $P < 0.01$ , \*\*\*\* $P < 0.0001$ .

853

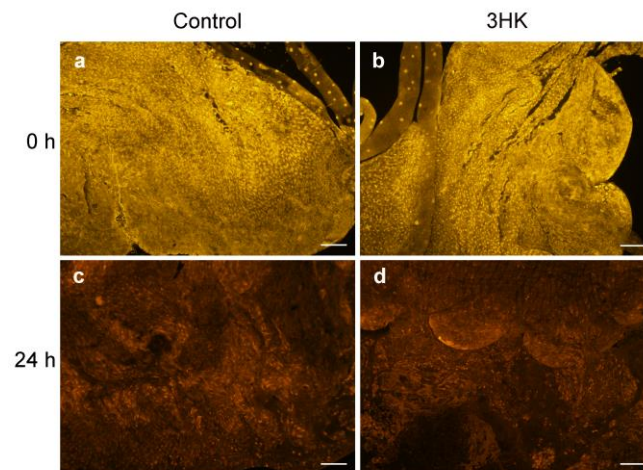

854

855 **Extended Data Fig. 2** DHE staining of midguts in 3-HK-treated (-) and control (+)  
856 mosquitoes at 0 h (a, b) and 24 h (c, d) post normal blood meal. Scale bars represent  
857 100  $\mu\text{m}$ . Images are representative of at least eight midguts.

858



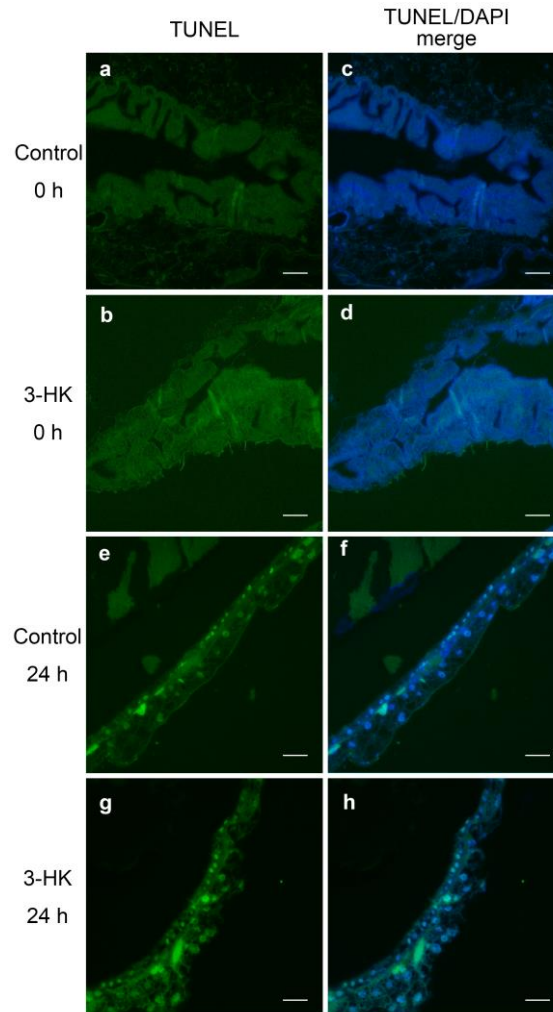

859

860 **Extended Data Fig. 3** TUNEL staining of midgut from 3-HK-treated mosquitoes and

861 controls at 0 h (a-d) and 24 h (e-i) post normal blood meal. Scale bars represent 50 μm.

862 Images are representative of at least four midguts.

863

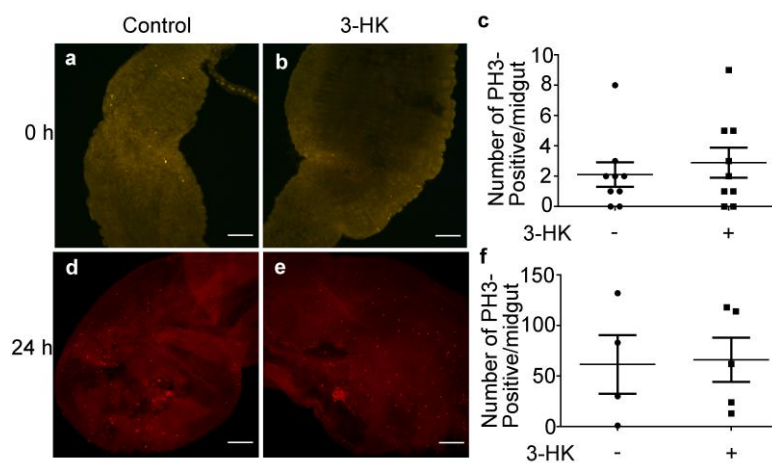

864

865 **Extended Data Fig. 4** PH3 staining of midguts from 3-HK-treated mosquitoes and  
866 controls at 0 hr (**a, b**) and 24hr (**d, e**) post normal blood meal. Scale bars represent 100  
867  $\mu\text{m}$ . Quantification of PH3-positive cells are shown in (**c**) and (**f**). Error bars indicate  
868 standard errors. Significance was determined by Student's *t*-test.  
869

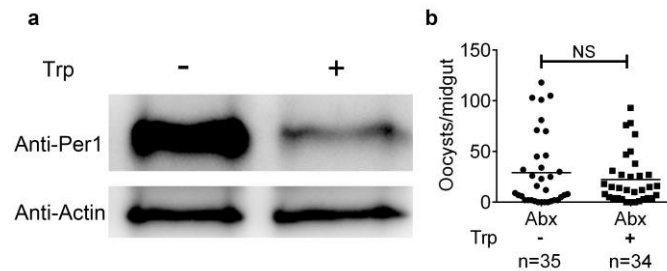

870

871 **Extended Data Fig. 5** Trp supplementation impairs PM structure

872 **a**, Western blot of Per1 in the midgut of Trp-treated (+) mosquitoes and control (-) 24 h  
873 post normal blood meal. **b**, Effect of Trp on *P. berghei* infection in Abx mosquitoes. Data  
874 were pooled from two independent experiments. Each dot represents an individual  
875 mosquito. Horizontal black bars indicate the median values. Significance was determined  
876 by Mann-Whitney tests.

877

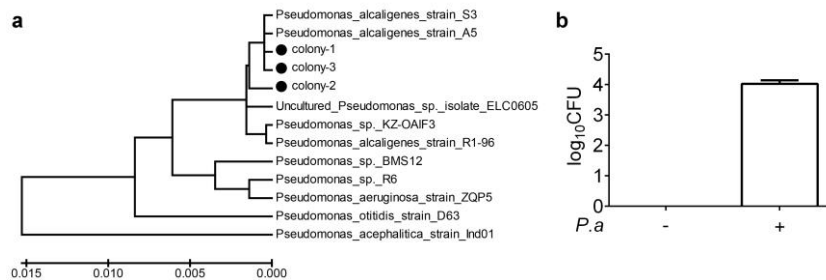

878

879 **Extended Data Fig. 6** Characterization of culturable *Pseudomonas* sp. in *An.*  
880 *stephensi*.

881 **a**, Phylogenetic tree showing the relationship between *P. alcaligenes* and other  
882 *Pseudomonas* sp. based on 16S rRNA genes sequences. **b**, Bacterial loads in the  
883 midgut of Abx (-) and *P. alcaligenes* (+) recolonized mosquitoes before blood meal (n=6).  
884 Error bars indicate standard errors.

885

886

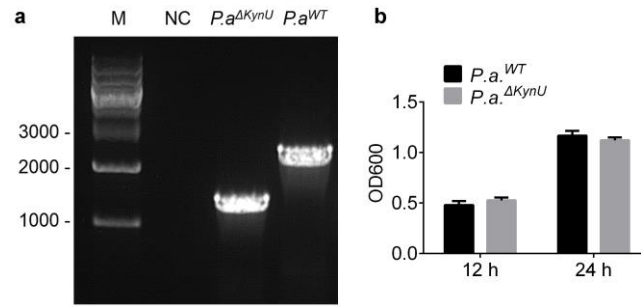

887

888 **Extended Data Fig. 7 Mutation of KynU in *P. alcaligenes*.**

889 **a**, Confirmation of *KynU* deletion by PCR. **b**, The growth rate of *P.a.* $\Delta$ *KynU* and *P.a.*<sup>WT</sup> *in*  
890 *vitro*.

891

892
